# Supplementary material for: Effective magnetic moment in cyclodextrin–polynitroxides: potential supramolecular vectors for magnetic resonance imaging
Source: Royal Society of Chemistry journal article supplement (doi:10.1039/c5ra14597j), 2015-01-01
Supplement: c5ra14597j1.pdf [file c5ra14597j1.pdf]

## Supporting Information

### EFFECTIVE MAGNETIC MOMENT IN CYCLODEXTRIN- POLYNITROXIDES: POTENTIAL SUPRAMOLECULAR VECTORS FOR MAGNETIC RESONANCE IMAGING

F. Cagliaris<sup>c</sup>, L. Melone<sup>\*a,b</sup>, F. Canepa<sup>d</sup>, G. Lamura<sup>c</sup>, F. Castiglione<sup>a</sup>, M. Ferro<sup>a</sup>, L. Malpezzi<sup>a</sup>, A. Mele<sup>a</sup>, C. Punta<sup>a</sup>, P. Franchi<sup>e</sup>, M. Lucarini<sup>e</sup>, B. Rossi<sup>f,g</sup>, F. Trotta<sup>h</sup>

- 
- <sup>a.</sup> Department of Chemistry, Materials and Chemical Engineering "G. Natta"  
Politecnico di Milano, Piazza L. Da Vinci 32, 20133 Milano, Italy. E-Mail: lucio.melone@polimi.it
- <sup>b.</sup> Università Telematica e-Campus, Via Isimbardi 10, 22060 Novedrate, Como (Italy).
- <sup>c.</sup> CNR-SPIN and Dipartimento di Fisica, Via Dodecaneso 33, 16146 Genova, Italy
- <sup>d.</sup> CNR-SPIN and Dipartimento di Chimica e Chimica Industriale, Via Dodecaneso 31, 16146 Genova, Italy.
- <sup>e.</sup> Dipartimento di Chimica "G. Ciamician" Università di Bologna, Via San Giacomo 11, 40126 Bologna, Italy.
- <sup>f.</sup> Elettra-Sincrotrone Trieste, Strada Statale 14 km 163.5, Area Science Park, 34149 Trieste, Italy.
- <sup>g.</sup> Department of Physics, University of Trento, Via Sommarive 14, 38123 Povo, Trento, Italy
- <sup>h.</sup> Department of Chemistry, University of Torino, Via Pietro Giuria 7, 10125 Torino, Italy
- 

---

|                                                                                            |           |
|--------------------------------------------------------------------------------------------|-----------|
| Synthetic procedure of <b>CD1</b>                                                          | p. S2     |
| Synthetic procedure of <b>CD2</b>                                                          | p. S2     |
| <sup>1</sup> H-NMR and ESI-MS of <b>CD1</b>                                                | p. S3     |
| <sup>1</sup> H-NMR and ESI-MS of <b>CD2</b>                                                | p. S4     |
| ESI-MS of <b>CD3</b> and <sup>1</sup> H- <sup>1</sup> H TOCSY NMR spectrum of <b>CD3-H</b> | p. S5     |
| <sup>1</sup> H-NMR and ESI-MS of <b>CD6</b>                                                | pp. S6-S8 |
| FT-IR spectra of all compounds                                                             | p. S9     |
| <b>CD6</b> magnetization data vs heptagonal model calculations                             | p.S10     |

---

### Synthesis of CD1

11.35 g (10 mmol) of  $\beta$ -CD were dissolved in 200 mL of 0.6 M NaOH(aq) at 0 °C. After 30 min, 2.3 g (12.1 mmol) of 4-Toluenesulfonyl chloride (TsCl), finely powdered with a mortar and pestle, were added to the aqueous solution. The reaction mixture was magnetically stirred for 8 h at 0 °C. The unreacted TsCl was removed by filtration onto a sintered glass funnel. The aqueous phase was acidified at 0 °C with 10 mL of HCl(37%) added dropwise. The product precipitated as white solid. The mixture was kept at 4 °C overnight, filtered on paper and washed with deionized water until neutral pH. In order to reduce the content of unreacted  $\beta$ -CD, the solid was dispersed in 100 mL of hot water (65 °C), stirred for 10 min, and finally filtered. This procedure was qualitatively followed by TLC (eluent: 2-propanol:H<sub>2</sub>O:EtOAc:NH<sub>4</sub>OH=5:3:1:0.5) and repeated for 3 times until the  $\beta$ -CD spot on TLC ( $R_f$ :0.25) was negligible compared to the CD1 spot ( $R_f$ :0.47). The final product was washed with acetone (100 mL  $\times$  3 times), dried in air for 24 h and under vacuum (< 5 mbar) at 25 °C for 3 h. Yield: 35% (4.50 g). The tosylation procedure gave also the formation of very small amounts of ditosylates ( $R_f$ =0.58), according to the literature [Brady2000]. Due to the small  $\Delta R_f$  between the mono- and the di-tosylate no attempt of further separation was made. ESI-MS analysis performed on the final product confirmed the presence of negligible amounts of pristine CD and di-tosylate (see Fig.SI2).

[Brady2000] B. Brady, N. Lynam, T. O'Sullivan, C. Ahern, R. Darcy, 6A-O-p-toluenesulfonyl- $\beta$ -cyclodextrin, *Org. Synth.* 2000, 77, 220.

### Synthesis of CD2

3.48 g (3 mmol) of CD1 were dissolved into 10 mL of DMSO. An excess of sodium azide (390 mg, 6 mmol) was added to the solution. The mixture was heated at 90 °C for 12 h. After cooling it at room temperature, the product was obtained by precipitation in acetone and filtering on filter paper. The white solid was washed with acetone (100 mL  $\times$  4 times) and dried in air. The excess of NaN<sub>3</sub> was removed by treating the aqueous solution containing the product (100 mL) with IRA900-Cl ionic exchange resin. Water was then removed under rotary evaporation. The white solid was finally washed with acetone (100 mL  $\times$  3 times) and dried in air. Quantitative yield.

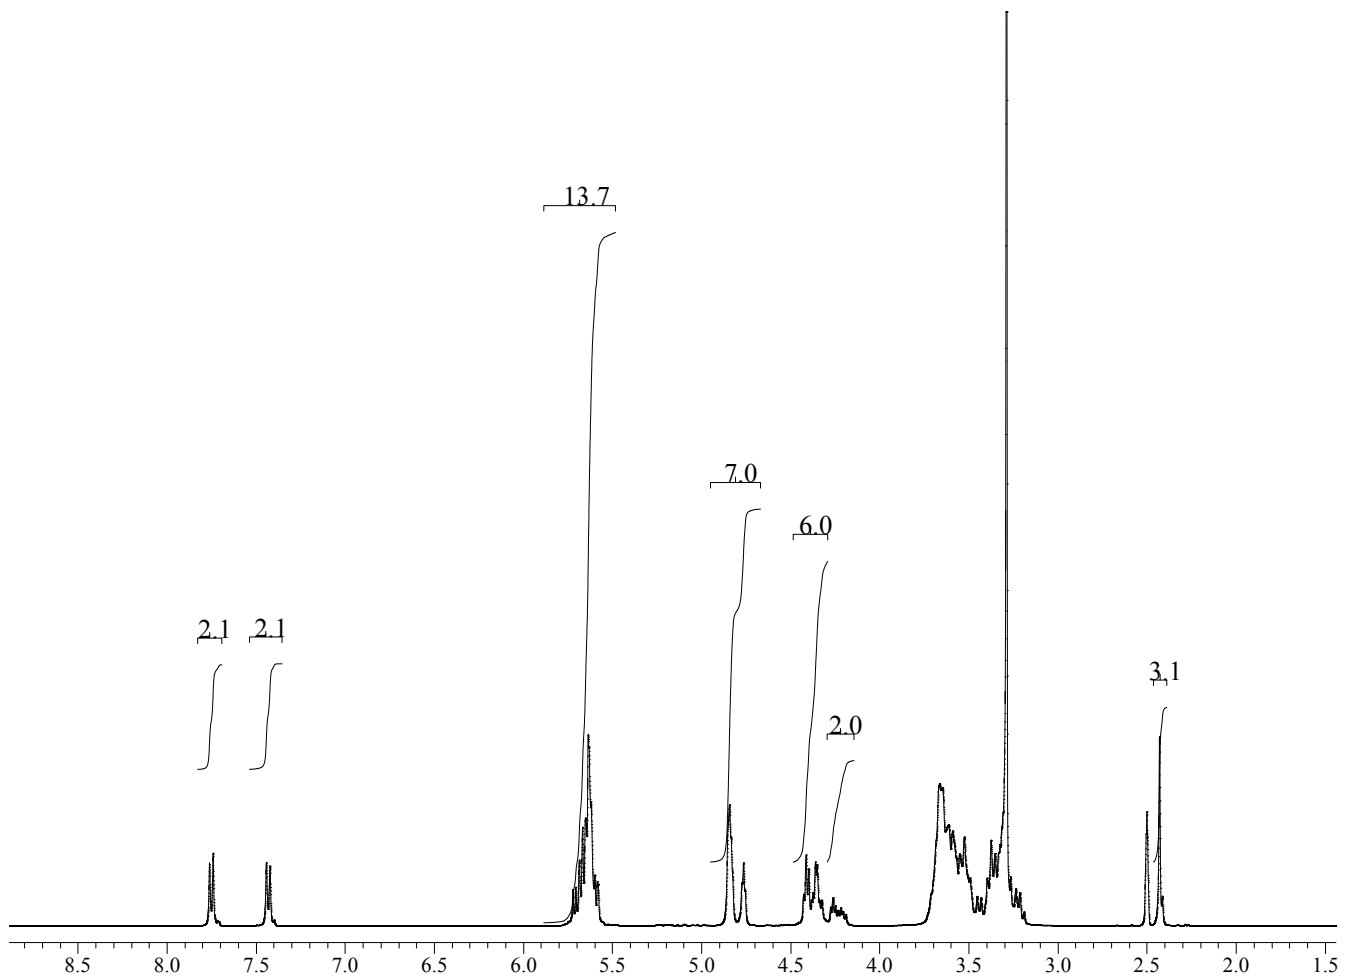

Fig.SI1. <sup>1</sup>H-NMR spectra of CD1 in DMSO-d<sub>6</sub> (305 K)

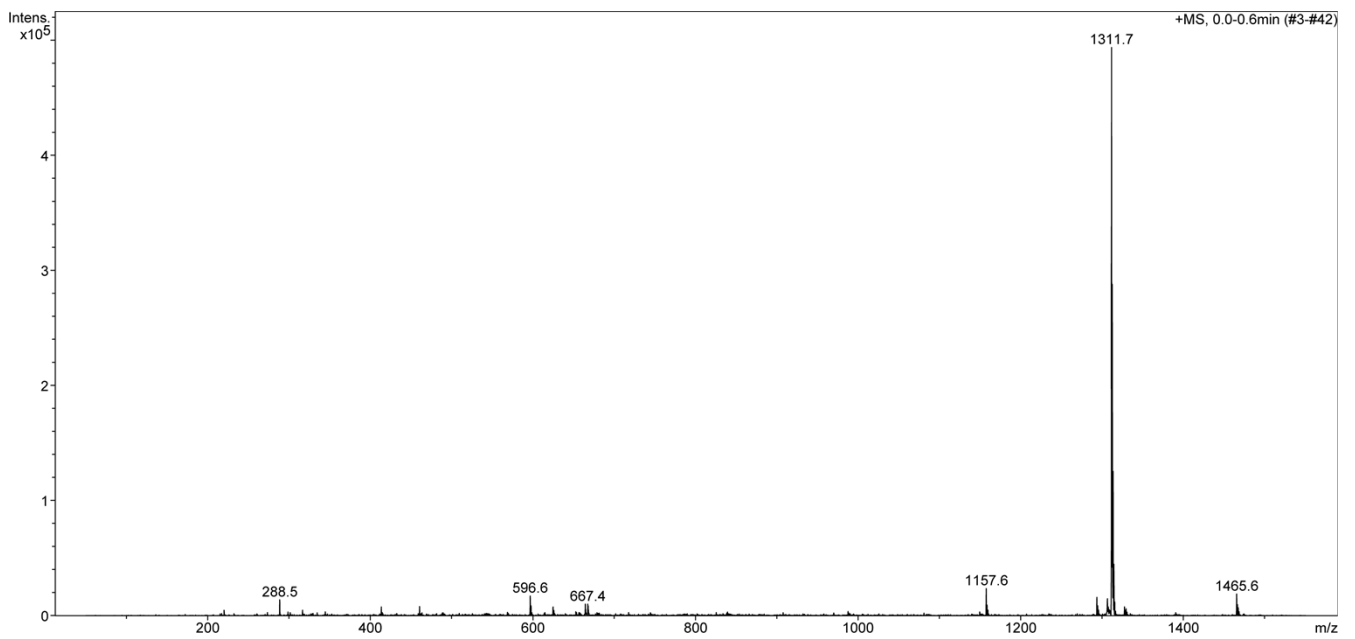

Fig.SI2. ESI-MS of CD1.

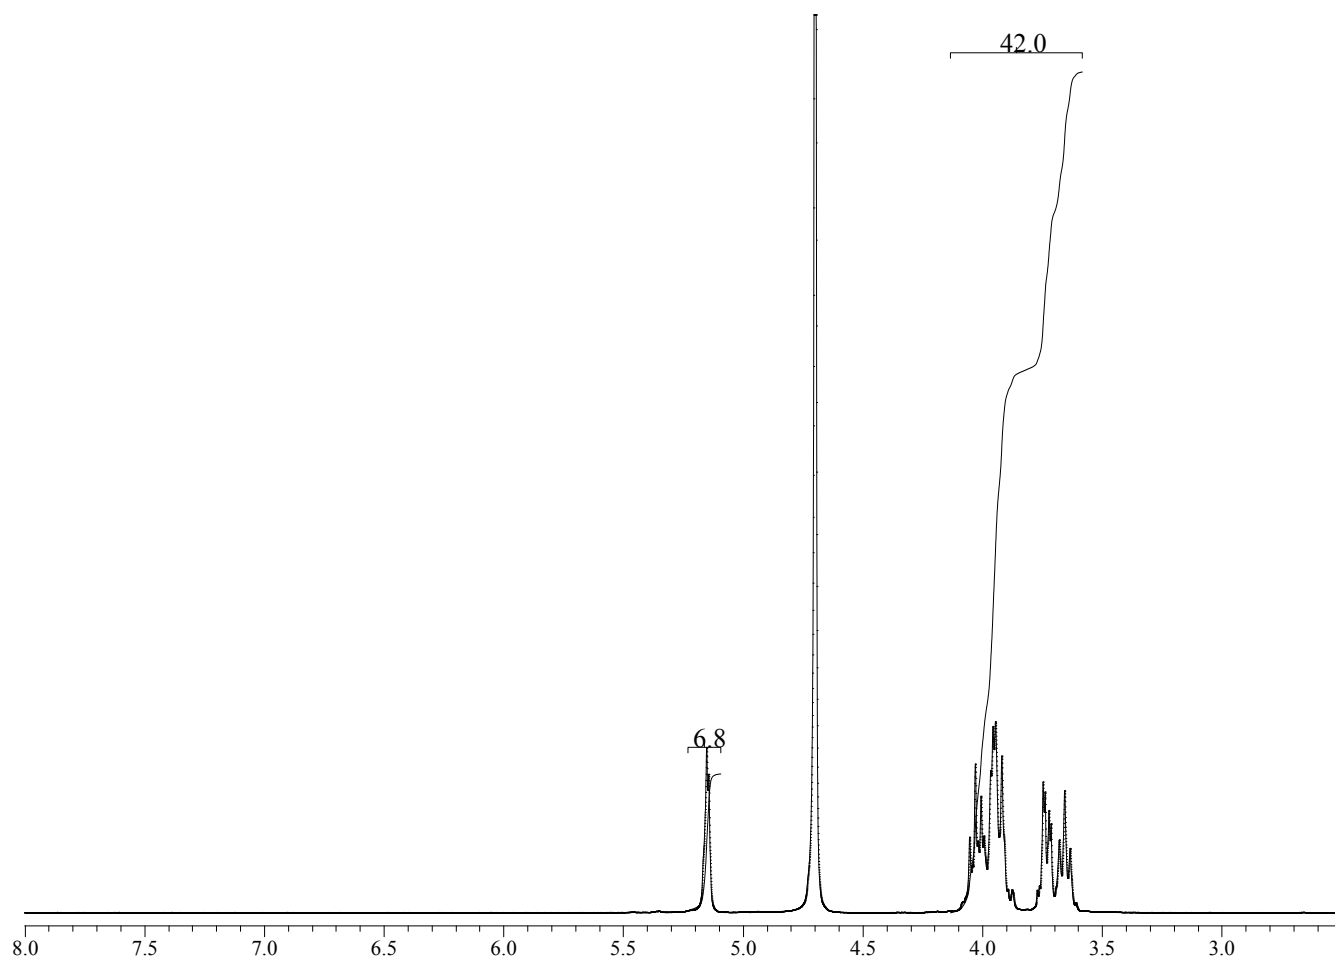

Fig.SI3.  $^1\text{H}$ -NMR spectra of **CD2** in  $\text{D}_2\text{O}$  (305 K).

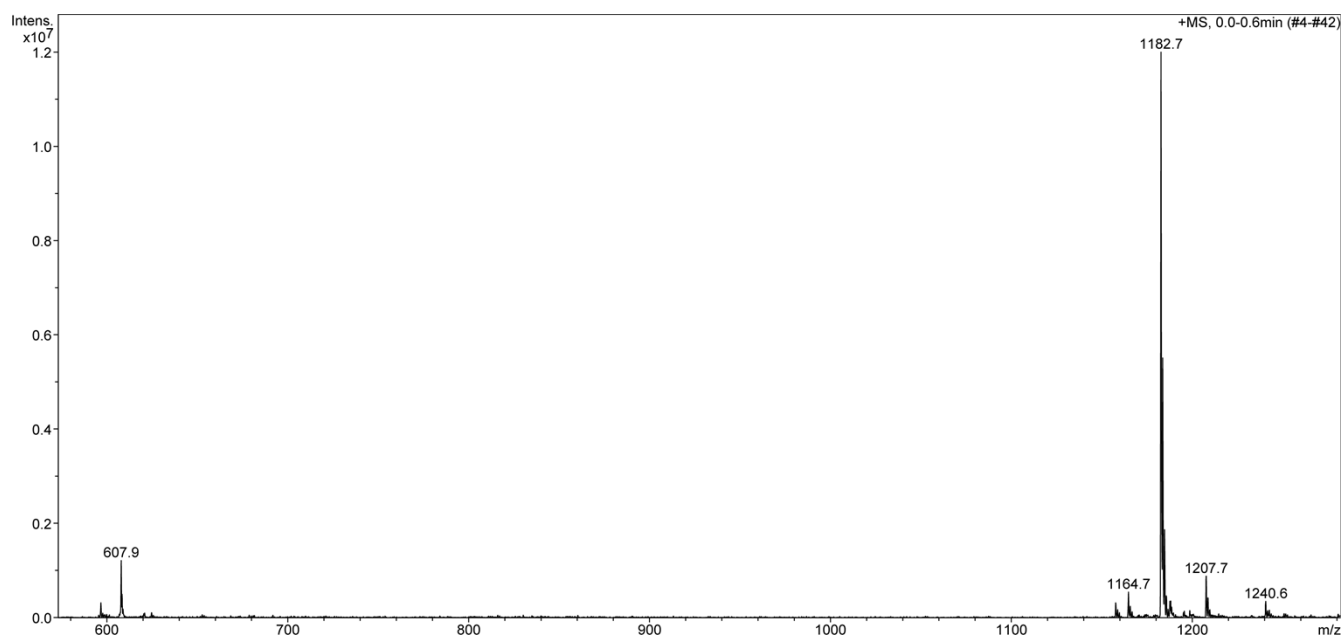

Fig.SI4. ESI-MS of **CD2**.

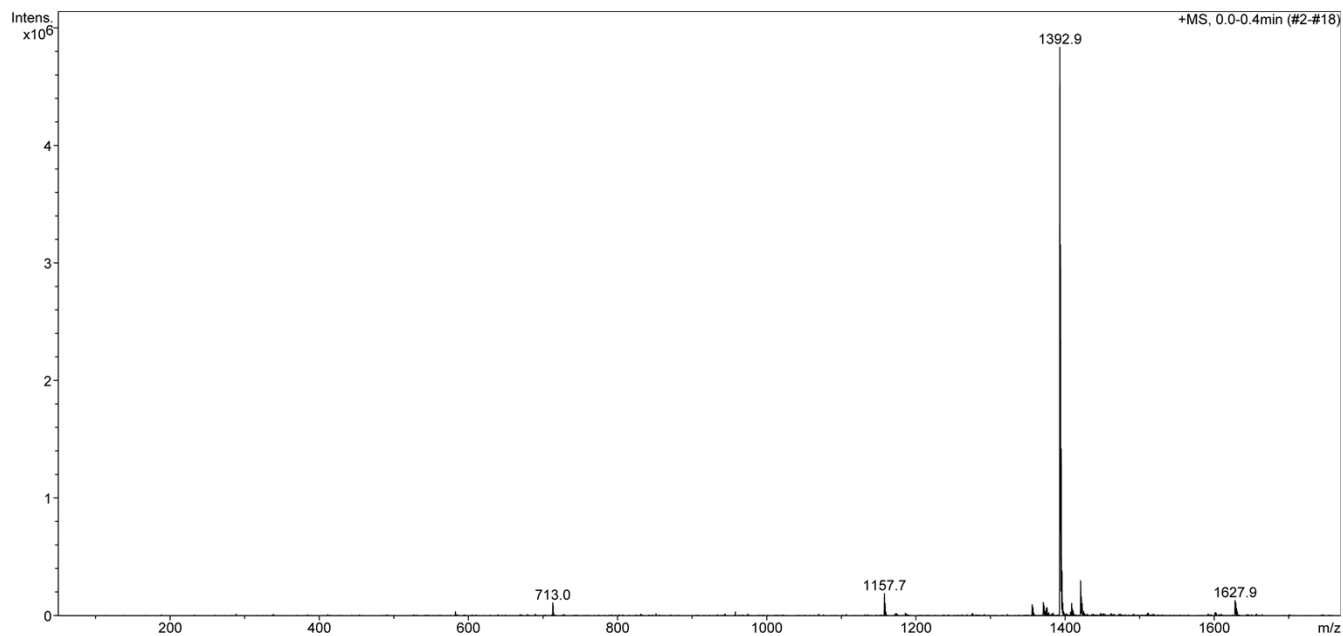

Fig.SI5. ESI-MS of **CD3**.

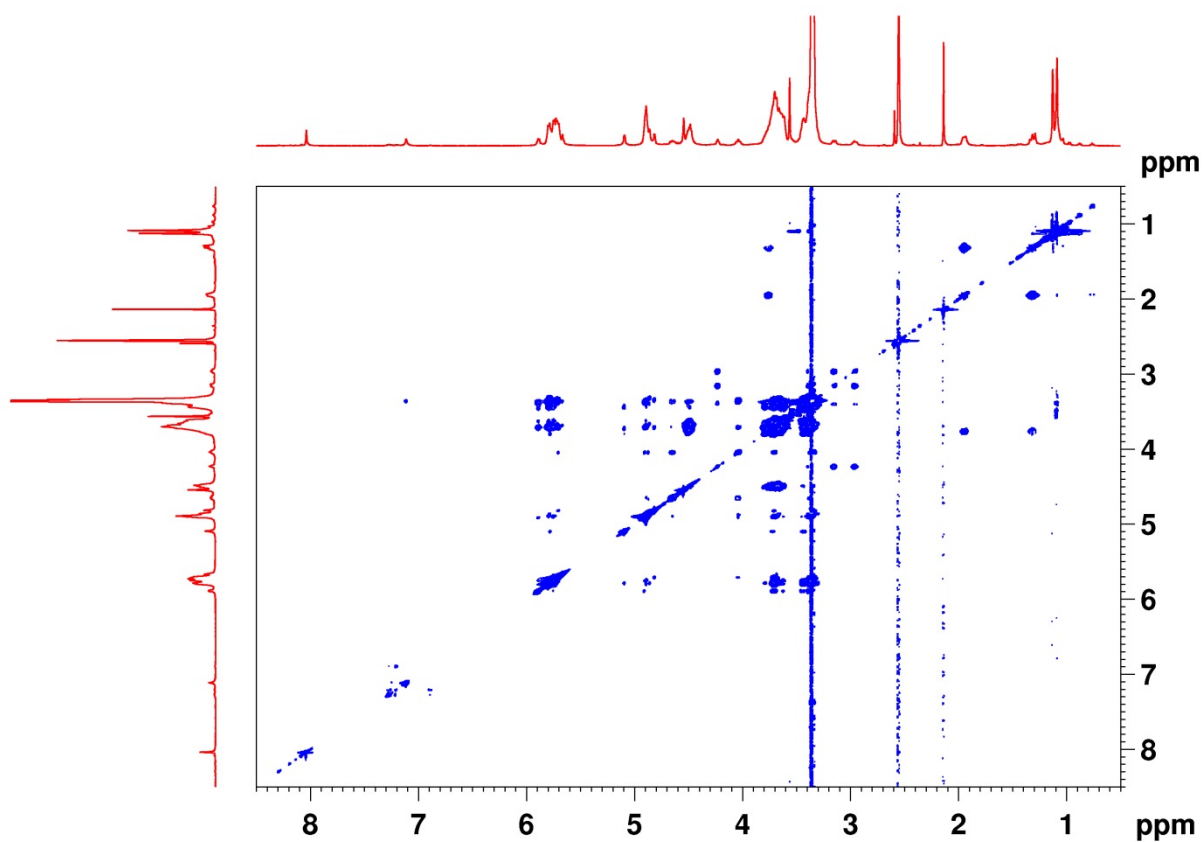

Fig.SI6. <sup>1</sup>H-<sup>1</sup>H TOCSY NMR spectrum of **CD3-H** (DMSO-d<sub>6</sub>).

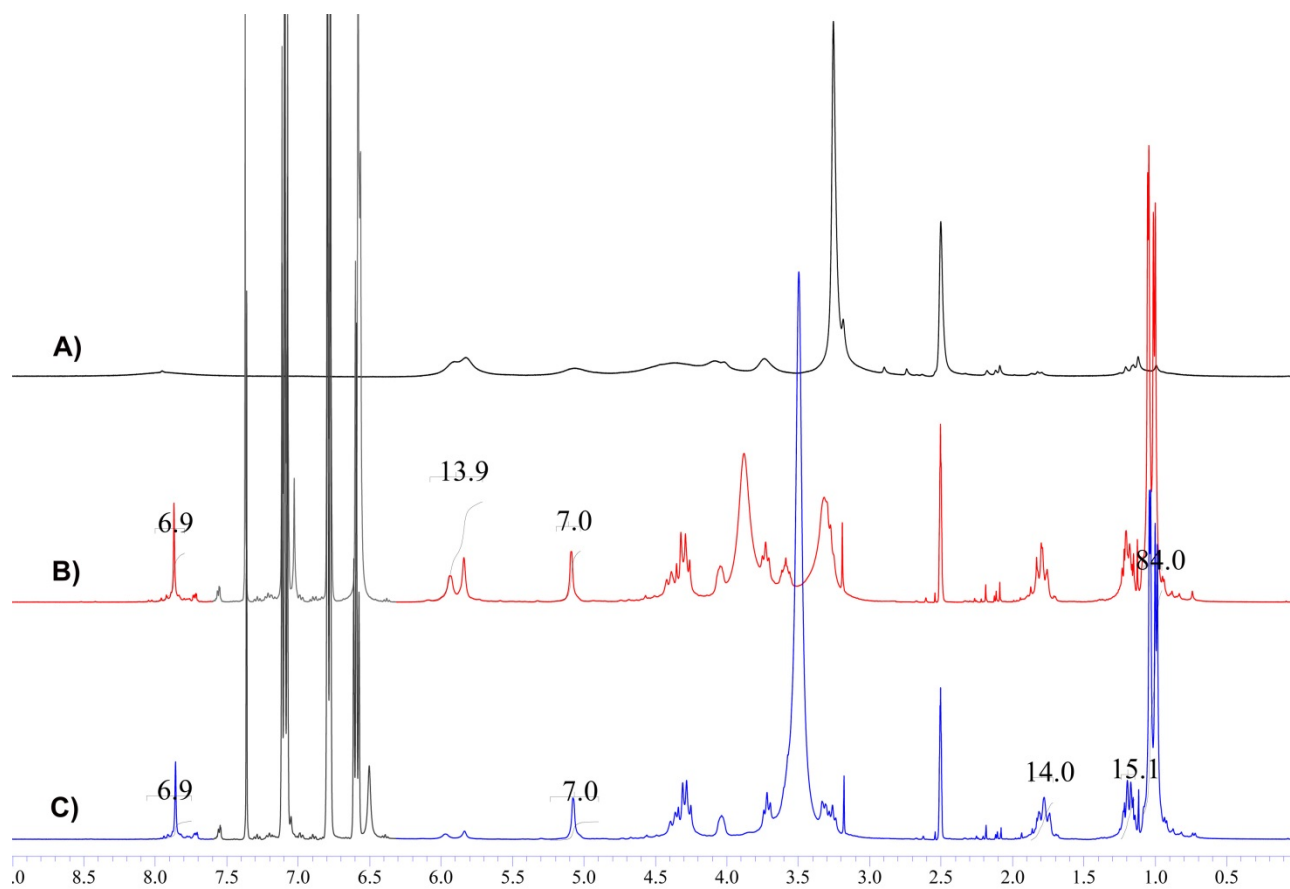

Fig.SI7. <sup>1</sup>H-NMR spectra of A) CD6 in DMSO-d<sub>6</sub>, B) after addition of phenylhydrazine in the nmr tube, C) after the addition of D<sub>2</sub>O. Phenylhydrazine peaks are indicated in grey scale.

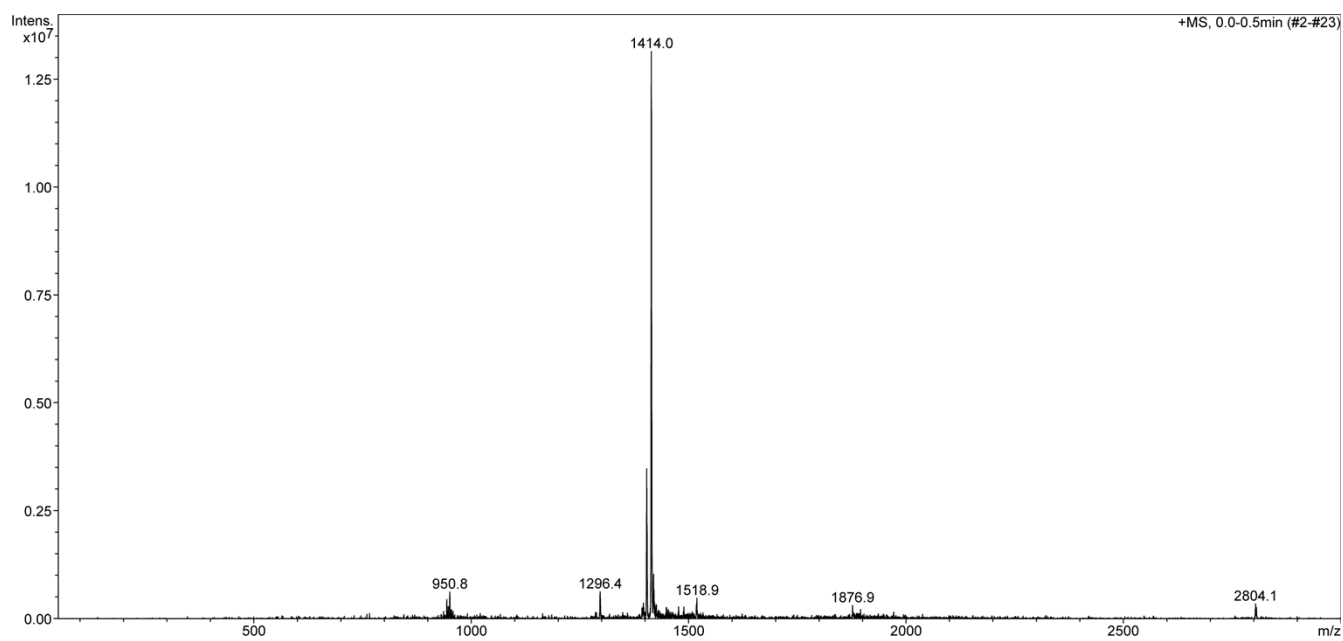

Fig.SI8. ESI-MS of CD6.

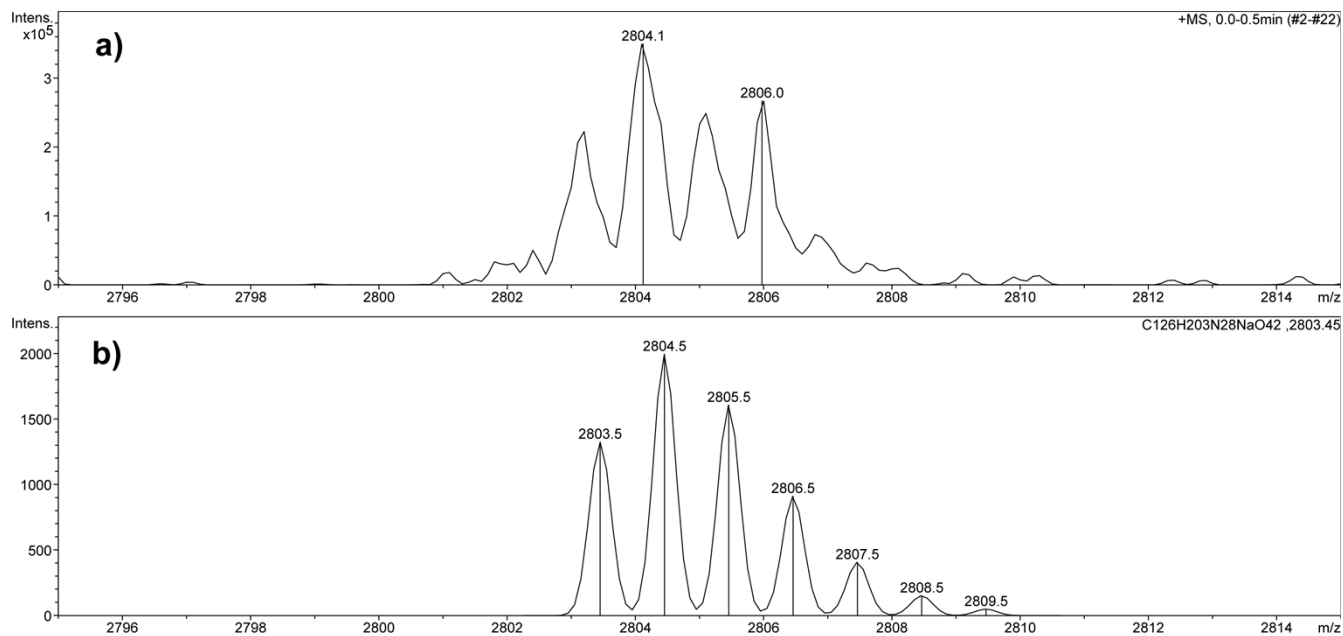

Fig.S19. a) ESI-MS peak of the  $[\text{CD}_6+\text{Na}]^+$  adduct; b) simulated peak corresponding to the formula  $\text{C}_{126}\text{H}_{203}\text{N}_{28}\text{O}_{42}\text{Na}$ .

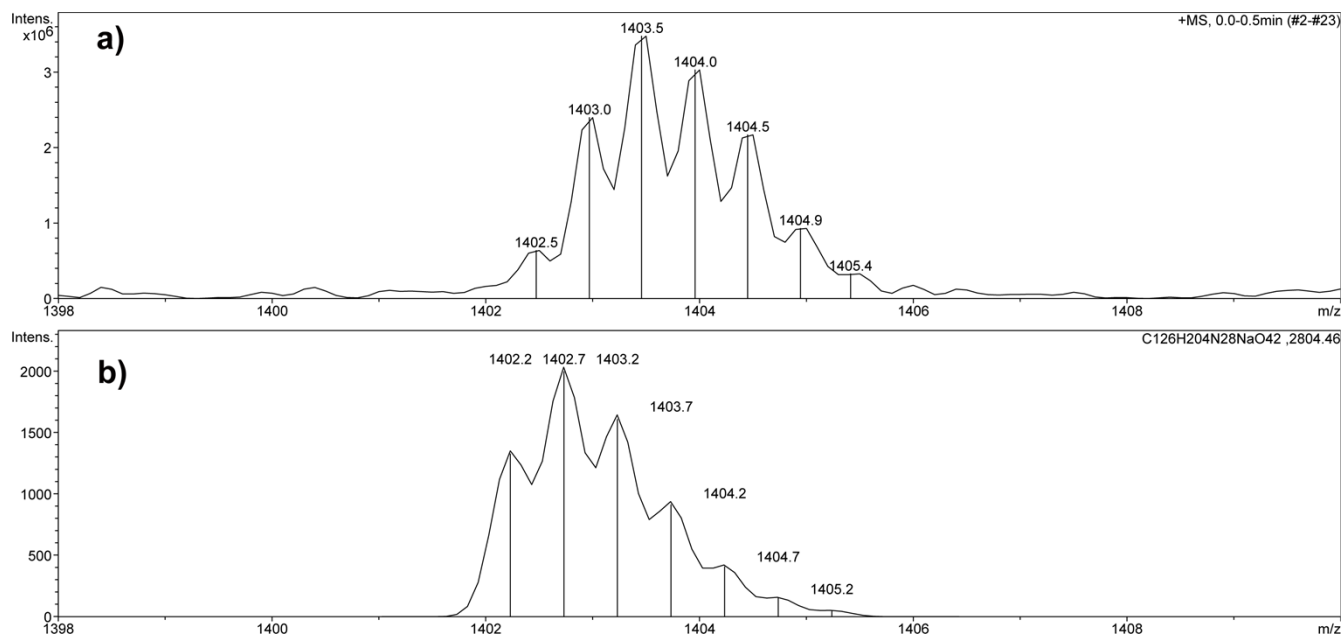

Fig.S110. a) ESI-MS peak of the  $[\text{CD}_6+\text{Na}+\text{H}]^{2+}$  adduct; b) simulated peak corresponding to the formula  $\text{C}_{126}\text{H}_{204}\text{N}_{28}\text{O}_{42}\text{Na}$ .

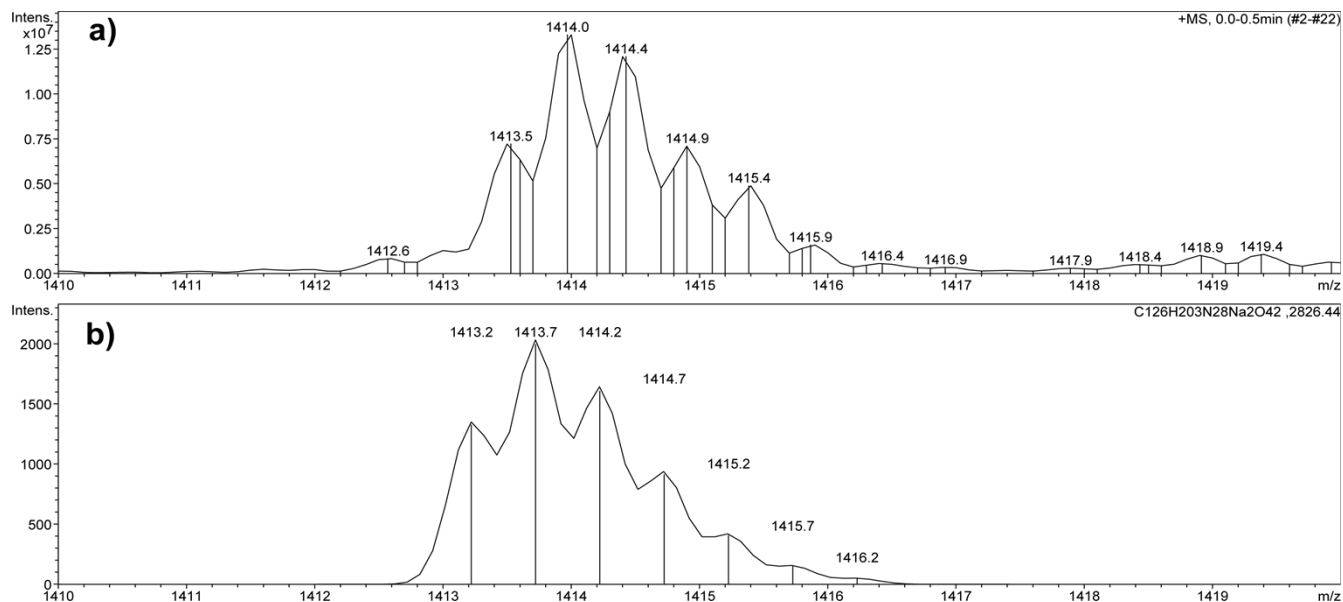

Fig.SI11. a) ESI-MS peak of the [CD6+2Na]<sup>2+</sup> adduct; b) simulated peak corresponding to the formula C<sub>126</sub>H<sub>203</sub>N<sub>28</sub>O<sub>42</sub>Na<sub>2</sub>.

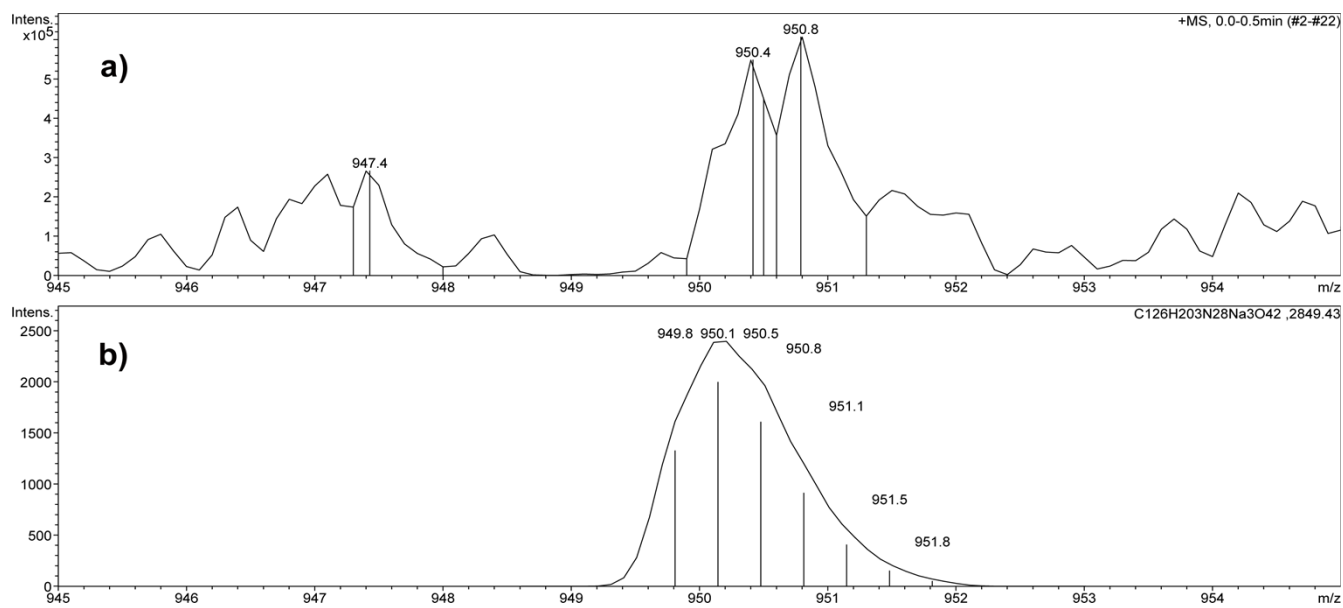

Fig.SI12. a) ESI-MS peak of the [CD6+3Na]<sup>3+</sup> adduct; b) simulated peak corresponding to the formula C<sub>126</sub>H<sub>203</sub>N<sub>28</sub>O<sub>42</sub>Na<sub>3</sub>.



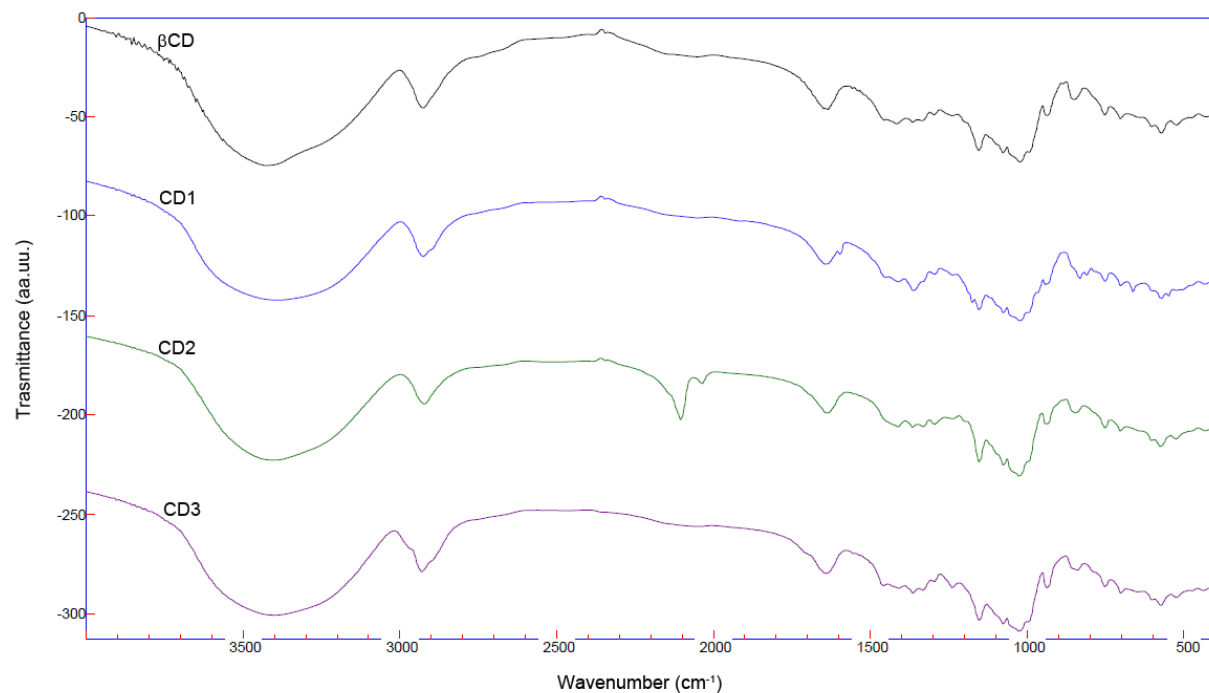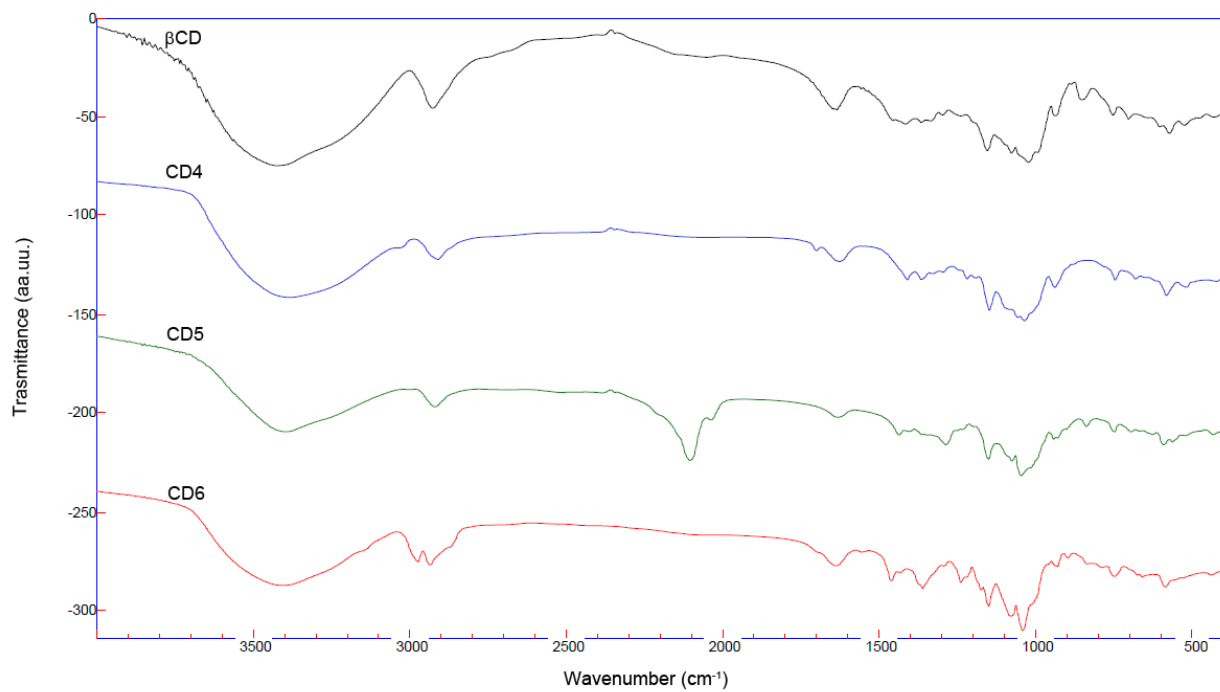

Fig.SI13. FT-IR spectra (KBr).

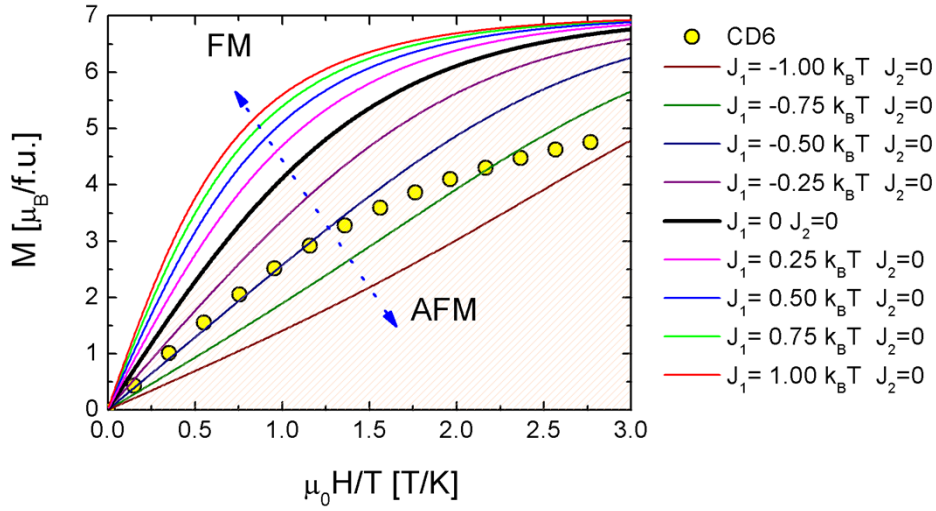

Fig. SI14: **CD6** magnetization data vs heptagonal model (see Fig. 7a in the full paper) calculations for different values of the exchange integrals:  $J_1$  was tuned from -1  $k_B T$  (strong AFM interactions) to 1  $k_B T$  (strong FM interactions) setting  $J_2=0$  for simplicity. It results that none of the theoretical curves matches the experimental data. The same simulation has been carried out scanning  $J_2$  in a reasonable range without any significant result.
